# Supplementary material for: Analysis of Traffic Statics and Dynamics in Signalized Networks: A Poincaré Map Approach
Source: Atypon-hosted journal article supplement (doi:10.1287/trsc.2017.0740), 2017-05-25
Supplement: trsc.2017.0740-sm.pdf [file trsc.2017.0740-sm.pdf]

# Appendices

## A Derivation of the four regions in Figure 2(a)

When  $(\delta_1(t), \delta_2(t)) = (1, 0)$ ,  $g_1 = \min\{D_1, \frac{S_1}{\xi_1}, \frac{S_2}{1-\xi_1}\}$ , and  $g_2 = 0$ . Then Equation (5) can be written as

$$\frac{dk_1}{dt} = -\frac{1-\xi_1}{L} \min\{D_1, \frac{S_1}{\xi_1}, \frac{S_2}{1-\xi_1}\} \quad (22)$$

Depending on the selection of  $(k_1, k)$ , traffic dynamics vary a lot since the minimum function in Equation (22) will take one of the following three values:  $D_1$ ,  $\frac{S_1}{\xi_1}$ , and  $\frac{S_2}{1-\xi_1}$ .

- (i) When  $k_1 < k_c$ , we have  $D_1 < C < \frac{S_1}{\xi_1}$ . Then the bold dashed line to separate Region 1 and Region 4 occurs when  $D_1 = \frac{S_2}{1-\xi_1} < C$ . In this case,  $D_1 = v_f k_1$  and  $S_2 = v_f k_c \frac{k_j - 2k + k_1}{k_j - k_c}$ , which

leads to

$$k = \frac{k_j}{2} - \frac{[(1 - \xi_1)k_j - (2 - \xi_1)k_c]k_1}{2k_c}. \quad (23)$$

(ii) When  $k_1 > k_c$  and  $D_1 = C < \frac{S_1}{\xi_1}$ , the bold dashed line to separate Region 1 and Region 2 is

$$k_1 = k_c. \quad (24)$$

The bold dashed line to separate Region 2 and Region 4 occurs when  $D_1 = \frac{S_2}{1 - \xi_1} = C$ . In this case,  $S_2 = v_f k_c \frac{k_j - 2k + k_1}{k_j - k_c}$ , which leads to

$$k = \frac{\xi_1 k_j + (1 - \xi_1)k_c + k_1}{2}. \quad (25)$$

(iii) When  $k_1 > k_c$  and  $D_1 = C > \frac{S_1}{\xi_1}$ , the bold dashed line to separate Region 2 and Region 3 is when  $D_1 = C = \frac{S_1}{\xi_1}$ , which leads to

$$k_1 = k_j - \xi_1(k_j - k_c). \quad (26)$$

The bold dashed line to separate Region 3 and Region 4 occurs when  $\frac{S_1}{\xi_1} = \frac{S_2}{1 - \xi_1} < C$ . In this case,  $S_1 = C \frac{k_j - k_1}{k_j - k_c}$  and  $S_2 = C \frac{k_j - 2k + k_1}{k_j - k_c}$ , which leads to

$$k = \frac{(2\xi_1 - 1)k_j + k_1}{2\xi_1}. \quad (27)$$

Therefore, based on the above analysis, the bold dashed lines in Figure 2(a) divide the  $k_1 - k$  space into four different regions, and the minimum function in Equation (22) will choose: (i)  $D_1 < C$  in Region 1; (ii)  $D_1 = C$  in Region 2; (iii)  $\frac{S_1}{\xi_1}$  in Region 3; and (iv)  $\frac{S_2}{1 - \xi_1}$  in Region 4.

## B Derivation of an approximate closed-form MFD

Here we derive the approximate closed-form MFD in (16) when  $0.5 < \xi < 1$  from the stationary states provided in Table 3 under different retaining ratios. For  $\xi > 0.5$ , the possible combinations of regions having stationary states are: (1,5), (1,7), (2,6), (4,7), (3,5), (3,7), and (3,8). For regions (4,7) and (3,8), the stationary states are gridlock states, and therefore, the average network average flow-rates are zero. For the rest of the regions, we can approximate the average network flow-rate using Equation (15).

(1) For regions (1,5), the fixed point is  $k_1^* = \frac{2k}{1 + e^{-\gamma_1 \pi T}}$ . Starting with  $k_1(nT) = k_1^*$ , we can get

$k_1(nT + \pi T) = k_1(nT)e^{-\gamma_1\pi T}$ . Since ring 1 is uncongested,  $g_1(k_1) = v_f k_1$ . Therefore, the average network flow-rate is

$$\begin{aligned} q(k) &\approx \pi \frac{g_1(k_1^*) + g_1(k_1(nT + \pi T))}{2} = \frac{1}{2} \pi v_f (k_1^* + k_1(nT + \pi T)) \\ &= \frac{1}{2} \pi v_f 2k \frac{1 + e^{-\gamma_1\pi T}}{1 + e^{-\gamma_1\pi T}} = \pi v_f k. \end{aligned} \quad (28)$$

(2) For regions (1, 7), the fixed point is  $k_1^* = \frac{(k_j - 2k)(e^{\gamma_5\pi T} - 1)}{1 - e^{(\gamma_5 - \gamma_1)\pi T}}$ . Starting with  $k_1(nT) = k_1^*$ , we can get  $k_1(nT + \pi T) = k_1(nT)e^{-\gamma_1\pi T}$ . Since ring 1 is uncongested,  $g_1(k_1) = v_f k_1$ . In addition, since  $T$  is small,  $-\gamma_1\pi T$ ,  $\gamma_5\pi T$ , and  $(\gamma_5 - \gamma_1)\pi T$  are also small. Therefore, the average network flow-rate is

$$\begin{aligned} q(k) &\approx \frac{1}{2} \pi v_f (k_1^* + k_1(nT + \pi T)) = \frac{1}{2} \pi v_f (k_j - 2k) \frac{(e^{\gamma_5\pi T} - 1)(1 + e^{-\gamma_1\pi T})}{1 - e^{(\gamma_5 - \gamma_1)\pi T}} \\ &\approx \frac{1}{2} \pi v_f (k_j - 2k) \frac{\gamma_5\pi T(2 - \gamma_1\pi T)}{(\gamma_1 - \gamma_5)\pi T} \approx \pi C \frac{(k_j - 2k)}{\xi(k_j - k_c) - k_c}. \end{aligned} \quad (29)$$

(3) For regions (2, 6), the fixed point is  $k_1^* = k_1(t)$ . In this combination of regions, the out-fluxes are restricted by the capacity. Therefore, the average network flow-rate is

$$q(k) \approx \pi \frac{g_1(k_1^*) + g_1(k_1(nT + \pi T))}{2} = \pi C. \quad (30)$$

(4) For regions (3, 5), the fixed point is  $k_1^* = \frac{2k(1 - e^{-\gamma_4\pi T}) - k_j(e^{\gamma_2\pi T} - 1)e^{-\gamma_4\pi T}}{1 - e^{(\gamma_2 - \gamma_4)\pi T}}$ . Starting with  $k_1(nT) = k_1^*$ , we can get  $k_1(nT + \pi T) = k_j(1 - e^{\gamma_2\pi T}) + k_1(nT)e^{\gamma_2\pi T}$ . In this combination of regions, the out-flux is governed by the supply in ring 1, i.e.,  $g_1(k_1) = \frac{S_1(k_1)}{\xi} = \frac{C(k_j - k_1)}{\xi(k_j - k_c)}$ . Therefore, the average network flow-rate is

$$\begin{aligned} q(k) &\approx \pi C \frac{2k_j - (k_j(1 - e^{\gamma_2\pi T}) + k_1^*(1 + e^{\gamma_2\pi T}))}{2\xi(k_j - k_c)} \approx \pi C \frac{2k_j - 2\frac{2k^*\gamma_4 - k_j^*\gamma_2}{\gamma_4 - \gamma_2}}{2\xi(k_j - k_c)} \\ &= \pi C \frac{(k_j - 2k)\frac{\gamma_4}{\gamma_4 - \gamma_2}}{\xi(k_j - k_c)} = \pi C \frac{(k_j - 2k)}{\xi(k_j - k_c) - k_c}. \end{aligned} \quad (31)$$

(5) For regions (3, 7), the fixed point is  $k_1^* = \frac{2k + k_j(e^{\gamma_2\pi T} - 1)}{e^{\gamma_2\pi T} + 1}$ . Starting with  $k_1(nT) = k_1^*$ , we can get  $k_1(nT + \pi T) = k_j(1 - e^{\gamma_2\pi T}) + k_1(nT)e^{\gamma_2\pi T}$ . In this combination of regions, the out-flux is governed by the supply in ring 1, i.e.,  $g_1(k_1) = \frac{S_1(k_1)}{\xi} = \frac{C(k_j - k_1)}{\xi(k_j - k_c)}$ . Therefore, the average

network flow-rate is

$$\begin{aligned}
q(k) &\approx \pi C \frac{2k_j - (k_j(1 - e^{\gamma_2 \pi T}) + k_1^*(1 + e^{\gamma_2 \pi T}))}{2\xi(k_j - k_c)} = \pi C \frac{2k_j - (k_j(1 - e^{\gamma_2 \pi T}) + 2k + k_j(e^{\gamma_2 \pi T} - 1))}{2\xi(k_j - k_c)} \\
&= \pi C \frac{k_j - k}{\xi(k_j - k_c)}. \tag{32}
\end{aligned}$$

From the average network flow-rates calculated above, we obtain (16) for the macroscopic fundamental diagram. ■

## C A secant algorithm of calculating stationary states with general signal settings and turning ratios

**Inputs:**  $k$ ,  $T$ ,  $\Delta$ ,  $\xi$ , and  $\Phi(k_1)$

**Initialization:** vector of stationary states, i.e.,  $SS=[]$ ; minimum value of  $k_1$ , i.e.,  $k_{1,min} = \max\{2k - k_j, 0\}$ ; maximum value of  $k_1$ , i.e.,  $k_{1,max} = \min\{2k, k_j\}$ ; the threshold of  $k_1$ , i.e.,  $e_k$ ; searching step, i.e.,  $\Delta k$ ; maximum number of iterations, i.e.,  $n_{max}$

**For**  $k_1 = k_{1,min} : \Delta k : k_{1,max}$

Set  $k_1^0 = k_1$  and calculate  $\Phi(k_1^0)$

**If**  $\Phi(k_1^0) == 0$

$k_1^0$  is a root, and add it to SS

**Else**

Set  $k_1^1 = Pk_1^0$  and calculate  $\Phi(k_1^1)$

**For**  $n=1 : n_{max}$

**If**  $|k_1^1 - k_1^0| < e_k$  **or**  $\Phi(k_1^1) == 0$ , add  $k_1^1$  to SS and break

**If**  $\Phi(k_1^1) = \Phi(k_1^0) \neq 0$ , continue

$k_1^{tmp} = k_1^1 - \Phi(k_1^1) \left[ \frac{k_1^1 - k_1^0}{\Phi(k_1^1) - \Phi(k_1^0)} \right]$ , and calculate  $\Phi(k_1^{tmp})$

$k_1^0 = k_1^1$  and  $\Phi(k_1^0) = \Phi(k_1^1)$

$k_1^1 = k_1^{tmp}$  and  $\Phi(k_1^1) = \Phi(k_1^{tmp})$

**End for**

**End if**

**End for**
